# Supplementary material
Source: Copernicus journal article supplement (doi:10.5194/egusphere-2026-2010)
Supplement: Supplementary file [file egusphere-2026-2010-AC7-supplement.pdf]

## Reply to RC6 by Chris W. Hughes

26 May 2026

**General Response:** The reviewer's analysis is incorrect.

**Special Comments:**

(1) *"The author argues that a consistent hydrostatic balance can be found using his two equations:*

$$\nabla_G p = (\partial_x p + \partial_x N \partial_z p) \hat{\mathbf{x}} + (\partial_y p + \partial_y N \partial_z p) \hat{\mathbf{y}} + (\partial_z p) \hat{\mathbf{z}} \quad (35)$$

$$\nabla_G \Phi = (\partial_x \Phi + \partial_x N \partial_z \Phi) \hat{\mathbf{x}} + (\partial_y \Phi + \partial_y N \partial_z \Phi) \hat{\mathbf{y}} + (\partial_z \Phi) \hat{\mathbf{z}} \quad (\text{R3})$$

*I agree that the two equations are consistent with the equation*

$$-\frac{1}{\rho} \nabla_G p + \nabla_G \Phi = 0$$

**Response:** Thanks.

(2) *"The problem is that each of them is wrong in a way which balances. ..."*

**Response:** Thank you very much for your critics. I admit I didn't explain clearly in AC6. Equations (35) and (R3) are correct. Here, I will explain it again.

The geopotential  $\Phi$  and geoidal undulation  $N$  are defined in the preprint by

$$\Phi = -g_0 Z \quad (15)$$

$$Z = \zeta + N \quad (16)$$

Substitution of (15) and (16) into (R3) gives

$$\nabla_G \Phi = -g_0 \hat{\mathbf{z}}$$

There are no Cartesian coordinates to be involved.

(3) *"We keep coming back to the same issue. Since gravity is the gradient of a potential, its component tangent to a constant potential surface is zero by construction. It is futile to keep searching for a way to claim otherwise"*

**Response:** This comment is incorrect.

The bumpy-geoid gradient  $(\partial_x N, \partial_y N)$  emerges in the horizontal pressure gradient force along the geopotential surface. See equation (35).
