# Supplementary material
Source: Copernicus journal article supplement (doi:10.5194/egusphere-2026-2010)
Supplement: Supplementary file [file egusphere-2026-2010-AC12-supplement.pdf]

## Final Responses

Thank you very much for your effort and time to review/comment on my manuscript.

My manuscript addresses a largely unexplored area, as highlighted by Staniforth and White (2025) in “*Almost everything you always wanted to know about representing gravity in global models but were afraid to ask.*” In particular, I demonstrate the coordinate invariance of combined gravity and pressure-gradient forces and show how a bumpy-geoid gradient naturally emerges in the horizontal momentum equation when expressed in geopotential coordinates.

I believe my rebuttal clearly demonstrates that the manuscript merits a decision of “major revision” rather than “rejection.”

Below is an outline of the revised manuscript, including a proposed title change. In the revision, I will aim to present the arguments with minimal reliance on formal mathematics, emphasizing physical interpretation and clarity.

### Proposed Title:

*Coordinate Invariance of Gravity–Pressure Gradient Forces and the Limitations of Spherical/Spheroidal Geopotential Approximations*

**Abstract:** Gravity-pressure gradient forces,  $-(\nabla p)/\rho + \nabla\Phi$ , are the only body forces for frictionless flow in oceans and depend on three scalar fields: density  $\rho$ , pressure  $p$ , and geopotential  $\Phi$ . The gradient operator  $\nabla$  varies with coordinates, but the gravity-pressure gradient forces,  $-(\nabla p)/\rho + \nabla\Phi$ , do not. Such a coordinate invariance causes the emergence of the bumpy-geoid ( $N$ ) gradient ( $g_0\nabla_h N$ ) in the horizontal momentum equation expressed in all coordinates used in ocean models. Use of publicly available ocean and geoidal ( $N$ ) datasets lead to the rejection of popularly used spherical/spheroidal geopotential approximation.

1. Introduction
2. True Horizontal and Horizontal Defined in Ocean Models
3. Gravity-Pressure Gradient Forces in Various Coordinates
  - 3.1. Local Cartesian Coordinates
  - 3.2. Geopotential Coordinates
  - 3.3. Pressure Coordinates
  - 3.4. Terrain-Following Coordinates
  - 3.5. Isopycnal Coordinates
  - 3.6. Hybrid Coordinates
4. Publicly Available Datasets
5. Invalid Spherical/Spheroidal Geopotential Approximation
  - 5.1. Geostrophic Flow and Thermal Wind Relation
  - 5.2. 1½ Layered Model with Rigid Lid
  - 5.3. Sverdrup-Stommel-Munk Wind-Driven Circulation Models
  - 5.4. Global Sverdrup and Stommel Volume Transport
6. Conclusions
